# Supplementary material
Source: PubMed Central journal article supplement (PMC3020435)
Supplement: supp_49_1_263__1.pdf [file supp_49_1_263__1.pdf]

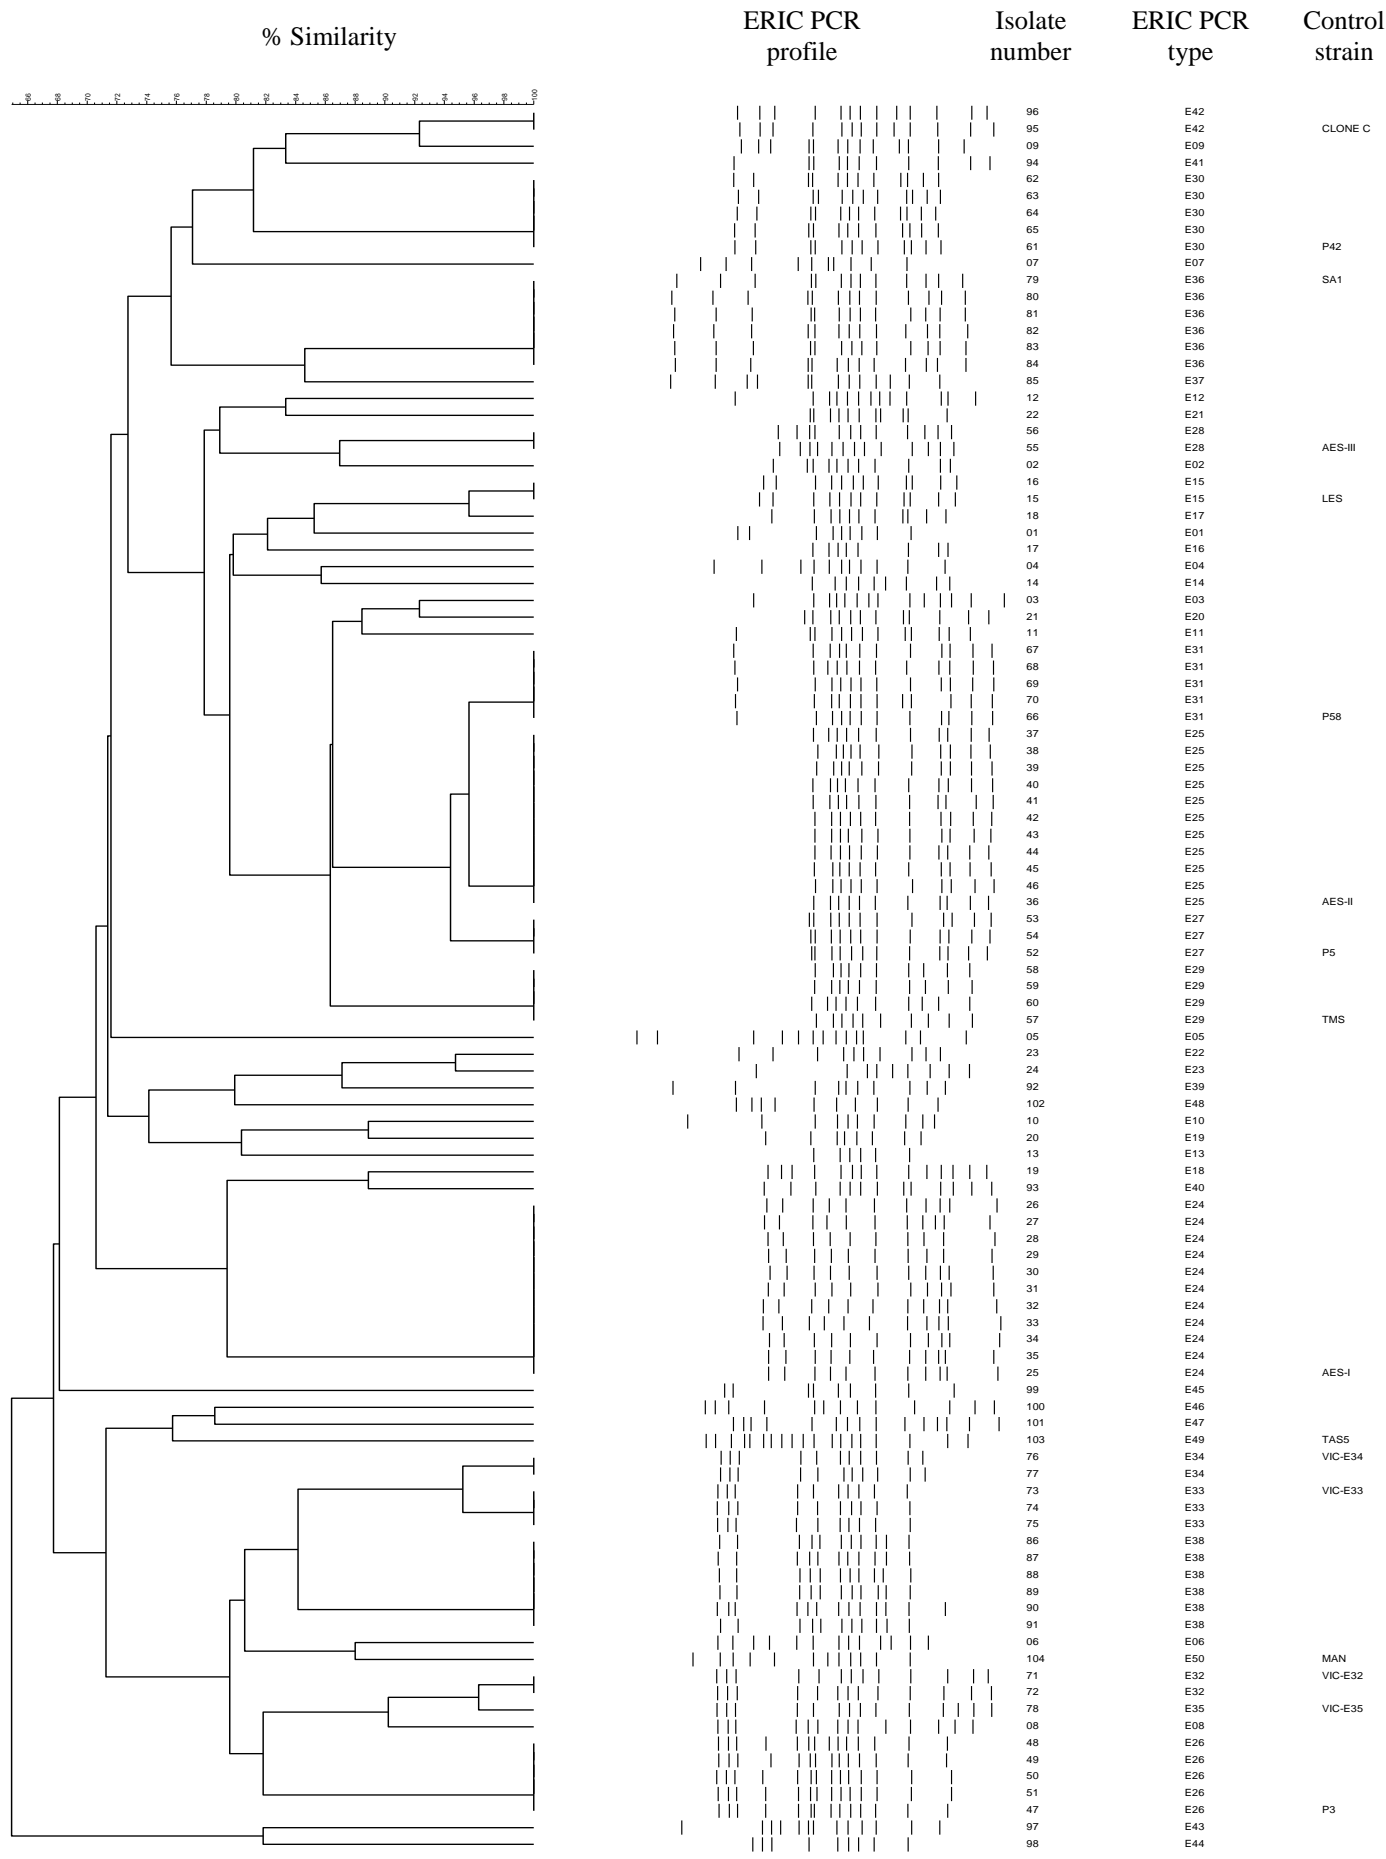

**Figure S1**

ERIC-PCR profiles of 93 clinical and 11 control *Pseudomonas aeruginosa* isolates after UPGMA cluster analysis (Dice similarity coefficient, position tolerance 1.0%, and optimization 1.5%).

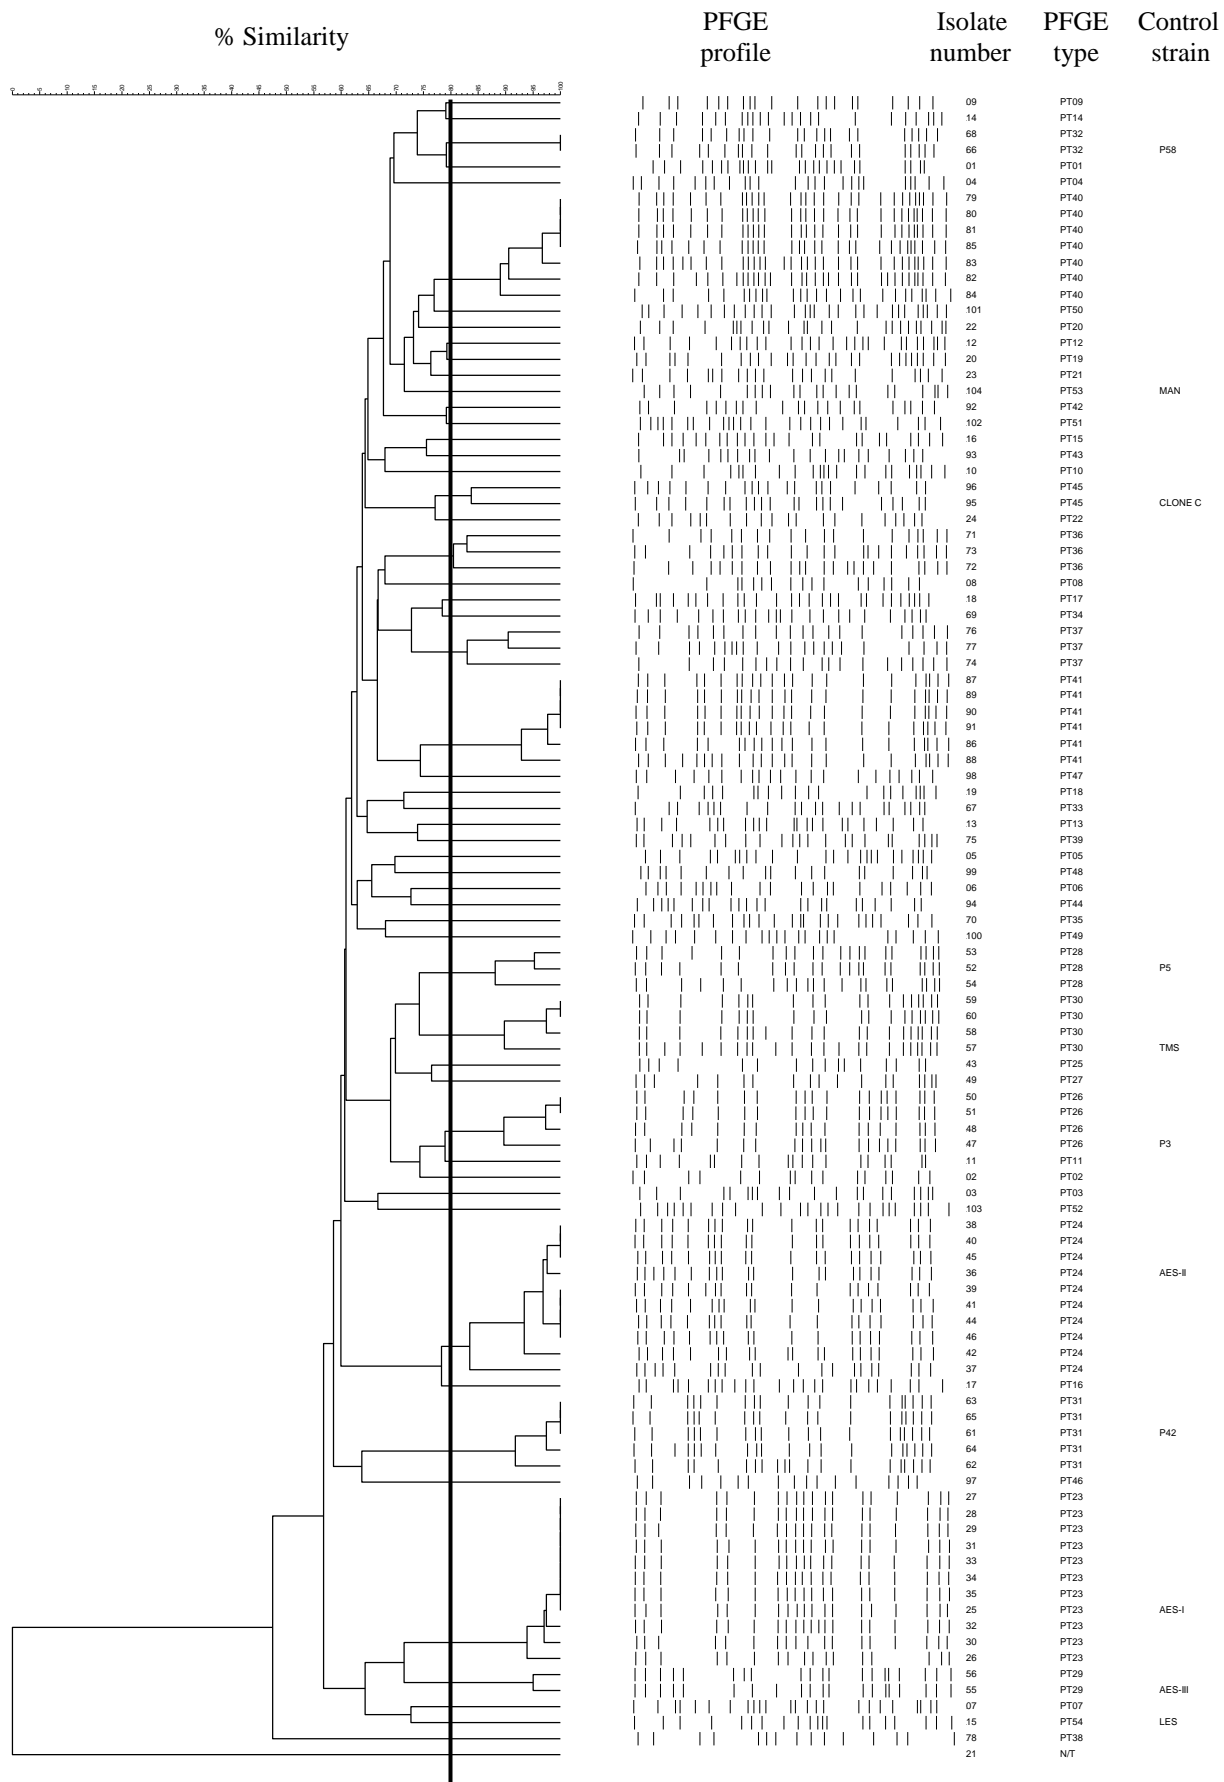

**Figure S2**

PFGE profiles of 92 clinical and 11 control *Pseudomonas aeruginosa* isolates after UPGMA cluster analysis (Dice similarity coefficient, position tolerance 1.0%, and optimization 1.5%). PFGE profiles related by  $\geq 80\%$  (black line) correspond to  $\leq 6$  band differences and are grouped into the same PFGE types.

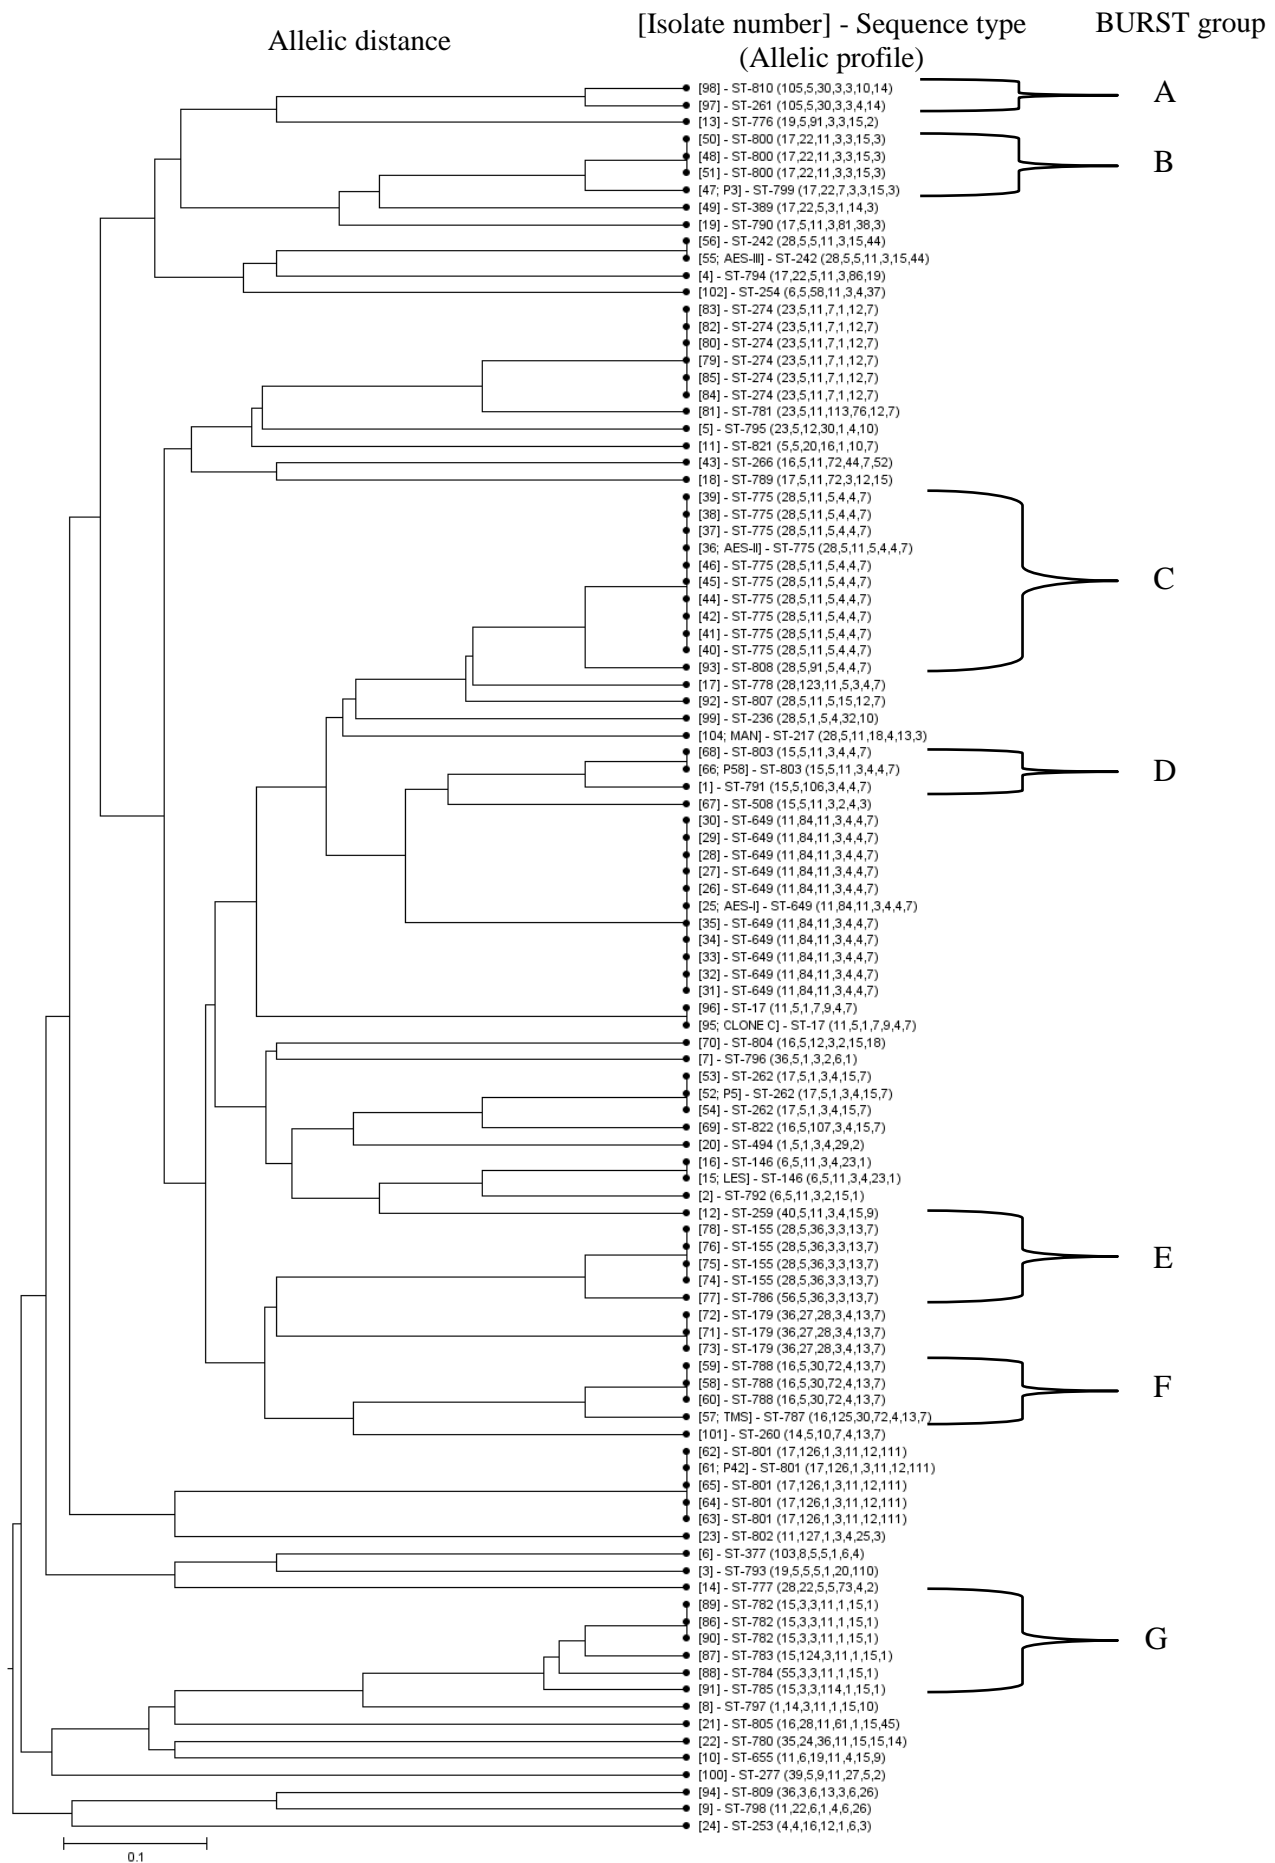

**Figure S3**

UPGMA tree generated from the allelic profiles of 92 clinical and 11 control *Pseudomonas aeruginosa* isolates.
